# Supplementary material
Source: PubMed Central journal article supplement (PMC4002848)
Supplement: 13_149_Ren.Suppl.pdf [file 13_149_Ren.Suppl.pdf]

## Supplemental Data

# Secreted Frizzled Related Protein 1 Modulates Taxane Resistance of Human Lung Adenocarcinoma

Jin Ren, Rui Wang, Haizhu Song, Guichun Huang, and Longbang Chen

Department of Medical Oncology, Jinling Hospital, School of Medicine, Nanjing University, Nanjing, China

Online address: <http://www.molmed.org>

The Feinstein Institute  
for Medical Research 

**Supplementary Table S1.** Primer sequences used for Real-time PCR and shRNA sequence for SFRP1.

| mRNA              | Primers                                                                                                                                                         | Expected size (bp) |
|-------------------|-----------------------------------------------------------------------------------------------------------------------------------------------------------------|--------------------|
| <i>SFRP1</i>      | Forward: 5'- AGAAGATGGTGCTGCCCAACCTG -3'<br>Reverse: 5'- AGTTCTTGTGAGCAGGGGCACC -3'                                                                             | 93                 |
| <i>SFRP4</i>      | Forward: 5'- CTCCCGGAGGATGTTAAGTG -3'<br>Reverse: 5'- GGGCTTAGGCGTTACAGTC -3'                                                                                   | 89                 |
| <i>SFRP1(U)</i>   | Forward: 5'- GTAGAGGAAGATTGGGTGTCGGT -3'<br>Reverse: 5'- GCGAACCTACGACTATACCACAACA -3'                                                                          | 150                |
| <i>SFRP1(M)</i>   | Forward: 5'- GTAGAGGAAGATTGGGTGTCGGC -3'<br>Reverse: 5'- GCGAACCTACGACTATACCACAACG -3'                                                                          | 150                |
| <i>β-catenin</i>  | Forward: 5'- AAGACATCACTGAGCCTGCCAT -3'<br>Reverse: 5'- CGATTGCGGGACAAAGGGCAA -3'                                                                               | 98                 |
| <i>c-myc</i>      | Forward: 5'- ACCACCAGCAGCGACTCTGA -3'<br>Reverse: 5'- TCCAGCAGAAGGTGATCCAGACT -3'                                                                               | 127                |
| <i>cyclin-D1</i>  | Forward: 5'- AATGACCCCGCACGATT -3'<br>Reverse: 5'- GCACAGAGGGCAACGAAGG -3'                                                                                      | 108                |
| <i>E-cadherin</i> | Forward: 5'- CATTCCCAACTCCTCTCCTGGC -3'<br>Reverse: 5'- ATGGGCCTTTTTCATTTCTGGG -3'                                                                              | 90                 |
| <i>Vimentin</i>   | Forward: 5'- AGTTCAAGAACACCCGCACCAAC -3'<br>Reverse: 5'- CAGGAAGCGCACCTTGTCGATGT -3'                                                                            | 89                 |
| <i>N-cadherin</i> | Forward: 5'- CTTCAGGCGTCTGTAGAGGCTTC -3'<br>Reverse: 5'- TGCACATCCTTCGATAAAGACTGC -3'                                                                           | 95                 |
| <i>GAPDH</i>      | Forward: 5'- GCACCGTCAAGGCTGAGAAC -3'<br>Reverse: 5'- TGGTGAAGACGCCAGTGGG -3'                                                                                   | 128                |
| shRNA             | Forward: 5'- TTTGCCGGAGAGTTATCCTGATAAACTC<br>GAGTTATCAGGATAACTCTCCGGTTTTTG -3'<br>Reverse: 5'- GATCCAAAACCGGAGAGTTATCCTGAT<br>AAACTCGAGTTATCAGGATAACTCTCCGG -3' | —                  |
| shcontrol         | Forward: 5'- TTTGGCATTGCTTCTGTGTAATAACTCG<br>AGTAATTACACAGAAGCAATGCTTTTTG -3'<br>Reverse: 5'- GATCCAAAAGCATTGCTTCTGTGTAAT<br>TACTCGAGTAATTACACAGAAGCAATGC -3'   | —                  |

**SFRP1 MODULATES TAXANES RESISTANCE**

**Supplementary Table S2.** Differential methylation status in the CpG islands of genes in docetaxel-resistant SPC-A1/DTX cell line compared with parental SPC-A1 cell line.

| Hypermethylated Clone (rate) | BLAST Homology <i>Homo sapiens</i> | Gene name (Symbol)                                     | CpG island |
|------------------------------|------------------------------------|--------------------------------------------------------|------------|
| 1 (95.2%)                    | NM_002015                          | Forkhead box O1A ( <i>FOXO1A</i> )                     | +          |
| 2 (91.5%)                    | NM_033615                          | ADAM metallopeptidase domain 33 ( <i>ADAM33</i> )      | +          |
| 3 (89.7%)                    | NM_004364                          | CCAAT/enhancer binding protein, alpha ( <i>CEBPA</i> ) | +          |
| 4 (88.2%)                    | NM_003012                          | Secreted frizzled related protein 1 ( <i>SFRP1</i> )   | +          |
| 5 (87.3?)                    | AF252549                           | Filamin C, gamma ( <i>FLNC</i> )                       | +          |
| 6 (86.2%)                    | NM_004938                          | Death-associated protein kinase 1 ( <i>DAPK1</i> )     | +          |
| 8 (84.2%)                    | BC005022                           | Sorting nexin 9 ( <i>SNX9</i> )                        | +          |
| 9 (83.1%)                    | BC010444                           | Matrilin 2 ( <i>MATN2</i> )                            | +          |
| 10 (81.9%)                   | BC104883                           | Nucleosome assembly protein 1-like 5 ( <i>NAP1L5</i> ) | +          |
| 11 (81.6%)                   | U01184                             | Signal-transducing adaptor protein-2 ( <i>STAP2</i> )  | +          |
| 13 (80.7%)                   | AF023476                           | ADAM metallopeptidase domain 12 ( <i>ADAM12</i> )      | +          |
| 14 (80.6%)                   | AF319441                           | Homeobox D11 ( <i>HOXD11</i> )                         | +          |
| 15 (80.4%)                   | NM_001992                          | Coagulation factor II receptor ( <i>F2R</i> )          | +          |
| 16(80.3%)                    | NM_018009                          | TAP binding protein-like ( <i>TAPBPL</i> )             | +          |
| 17 (80.2%)                   | AF158733                           | Matrix metalloproteinase 14 ( <i>MMP14</i> )           | +          |
| 18 (80.1%)                   | AL133414                           | Runt-related transcription factor 3 ( <i>RUNX3</i> )   | +          |

**Supplementary Table S3.** Differentially expressed genes in docetaxel-resistant SPC-A1/DTX cell line compared with parental SPC-A1 cell line.

| GeneBank No. | Gene name (Symbol)                                          | Chromosome | Fold change |
|--------------|-------------------------------------------------------------|------------|-------------|
| NM_152578    | Fragile X mental retardation 1 neighbor ( <i>FMR1NB</i> )   | Xq27       | 31.52       |
| NM_004938    | Death-associated protein kinase 1 ( <i>DAPK1</i> )          | 9q34       | 29.45       |
| NM_012253    | Transketolase-like 1 ( <i>TKTL1</i> )                       | Xq28       | 28.18       |
| NM_144594    | Hypothetical protein FLJ32942 ( <i>FLJ32942</i> )           | 12q13      | 27.98       |
| AF023476     | ADAM metallopeptidase domain 12 ( <i>ADAM12</i> )           | 10q26      | 25.26       |
| NM_003012    | Secreted frizzled related protein 1 ( <i>SFRP1</i> )        | 2q31       | 24.15       |
| NM_005367    | Melanoma antigen family A, 12 ( <i>MAGEA12</i> )            | Xq28       | 22.42       |
| AF158733     | Matrix metalloproteinase 14 ( <i>MMP14</i> )                | 14q11      | 20.65       |
| NM_152578    | Fragile X mental retardation 1 neighbor ( <i>FMR1NB</i> )   | Xq27       | 19.10       |
| NM_006228    | Prepronociceptin ( <i>PNO</i> )                             | 8p21       | 18.38       |
| NM_005602    | Claudin 11 ( <i>CLDN11</i> )                                | 3q26       | 17.12       |
| NM_004988    | Melanoma antigen family A, 1 ( <i>MAGEA1</i> )              | Xq28       | 13.66       |
| NM_001002915 | Insulin growth factor-like family member 2 ( <i>IGFL2</i> ) | 19q13      | 12.52       |
| NM_013238    | DnaJ homolog, subfamily C-15 ( <i>DNAJC15</i> )             | 13q14      | 10.33       |
| NM_003480    | Microfibrillar associated protein 5 ( <i>MFAP5</i> )        | 12p13      | 8.28        |
| NM_005213    | Cystatin A ( <i>CSTA</i> )                                  | 3q21       | 7.10        |
| NM_003289    | Tropomyosin 2 (beta) ( <i>TPM2</i> )                        | 9p13       | 5.82        |
| NM_032048    | Elastin microfibril interfacer 2 ( <i>EMILIN2</i> )         | 18p11      | 5.07        |
| NM_001323    | Cystatin E/M ( <i>CST6</i> )                                | 11q13      | 5.04        |
| NM_173571    | Hypothetical protein LOC255313 ( <i>LOC255313</i> )         | Xq24       | 5.02        |

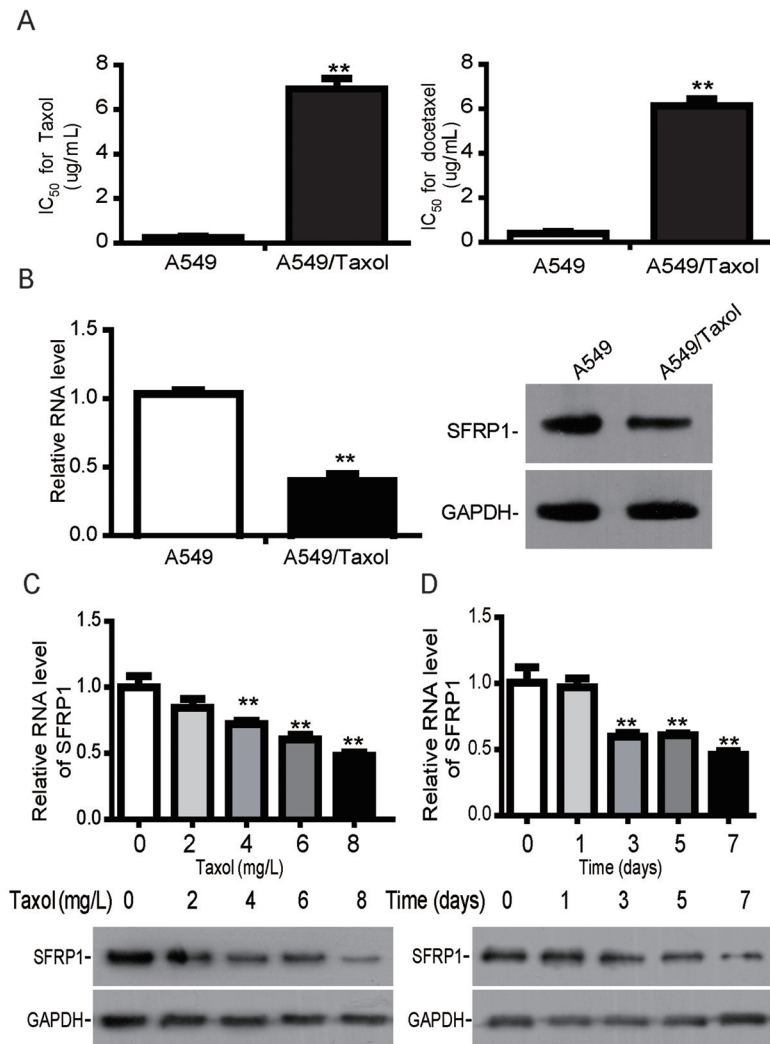

**Supplementary Figure S1.** The expression of SFRP1 was decreased in a dose and time dependent manner after exposure to Taxol in A549 cell line. (A) The IC<sub>50</sub> values of docetaxel or Taxol for A549 and A549/Taxol cell lines were determined using MTT assay. \*\*:  $P < 0.01$ . (B) The mRNA and protein levels of SFRP1 in A549 and A549/Taxol cell lines were determined by Real-time PCR and western blotting. \*\*:  $P < 0.01$ . (C) A549 cells were cultured in the presence of various concentrations of Taxol (0, 2, 4, 6 and 8  $\mu\text{g/L}$ ) for 24 h. Real-time PCR and western blotting were performed to detect the mRNA and protein levels of SFRP1. \*\*:  $P < 0.01$ . (D) A549 cells were cultured in the presence of Taxol (4  $\mu\text{g/L}$ ) for various time points (0, 1, 3, 5 and 7 d). Real-time PCR and western blotting were performed to detect the mRNA and protein levels of SFRP1. \*\*:  $P < 0.01$ .

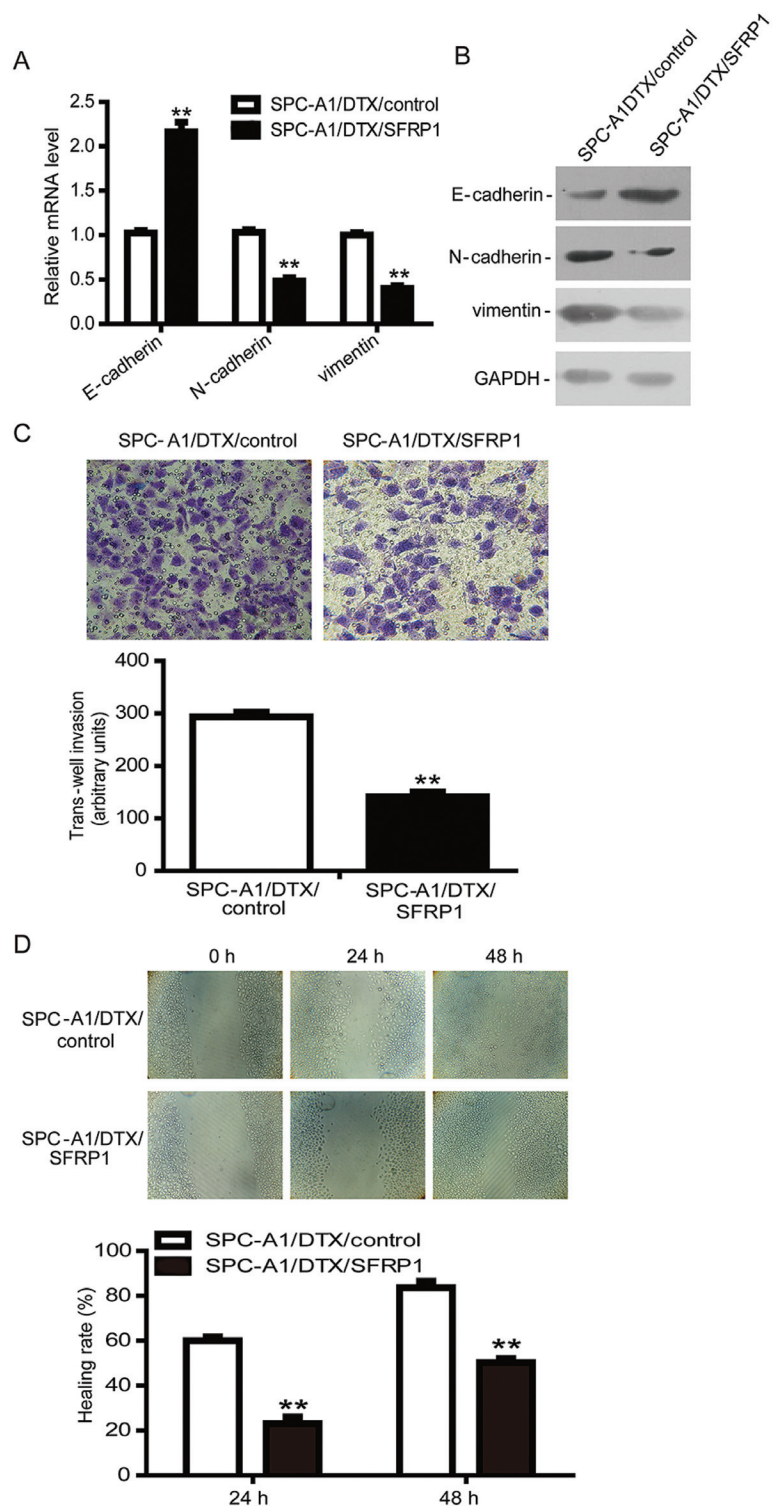

**Supplementary Figure S2.** Ectopic of SFRP1 suppressed EMT and the invasive ability of SPC-A1/DTX cell line. The levels of epithelial and mesenchymal markers were detected by Real-time PCR (A) and western blotting (B) in SPC-A1/DTX/control and SPC-A1/DTX/SFRP1 cell line. \*\*:  $P < 0.01$ . (C) The invasive ability of SPC-A1/DTX/SFRP1 cells was determined by transwell assay. \*\*:  $P < 0.01$ . (D) The migratory potential of SPC-A1/DTX/SFRP1 cells was detected by wound healing assay. \*\*:  $P < 0.01$ .
